# Supplementary material for: An In Vivo Inflammatory Loop Potentiates KRAS Blockade
Source: MDPI journal article supplement (doi:10.3390/biomedicines10030592), 2022-03-03
Supplement: s1 [file s1]

## SUPPLEMENTARY INFORMATION

### *An in vivo* inflammatory loop potentiates KRAS blockade

Kristina A.M. Arendt<sup>§</sup>, Giannoula Ntaliarda<sup>§</sup>, Vasileios Armenis, Danai Kati, Christin Henning, Georgia A. Giotopoulou, Mario A.A. Pepe, Laura V. Klotz, Anne-Sophie Lamort, Rudolf A. Hatz, Sebastian Kobold, Andrea C. Schamberger, and Georgios T. Stathopoulos.

## SUPPLEMENTARY TABLES

**Supplementary Table S1. Antibodies used in this study.**

| <b>Method</b> | <b>Target protein</b>                   | <b>Provider</b>          | <b>Catalog number</b> | <b>Dilution</b> |
|---------------|-----------------------------------------|--------------------------|-----------------------|-----------------|
| WB            | p-ERK                                   | Santa Cruz Biotechnology | sc-7383               | 1:1000          |
| WB            | t-ERK                                   | Santa Cruz Biotechnology | sc-514302             | 1:1000          |
| WB            | GAPDH                                   | Cell Signaling           | #2118                 | 1:2000          |
| WB            | rat anti-mouse IgG                      | Abcam                    | ab131368              | 1:10000         |
| WB            | anti-rabbit IgG VHH                     | Abcam                    | ab191866              | 1:10000         |
| IF            | IL-1 $\beta$ -Alexa488                  | Santa Cruz Biotechnology | sc-5155988<br>AF488   | 1:50            |
| IF            | CCR2                                    | Thermo Fisher Scientific | PA5-23043             | 1:50            |
| IF            | donkey anti-rabbit IgG<br>AlexaFluor647 | Abcam                    | ab150075              | 1:500           |
| IF            | normal mouse IgG2a Alexa<br>Fluor488    | Santa Cruz Biotechnology | sc-3891               | 1:50            |
| IF            | normal mouse IgG1 Alexa Fluor488        | Santa Cruz Biotechnology | sc-3890               | 1:50            |

**Supplementary Table S2. Oligonucleotides for qPCR.**

| <b>Primer</b>         | <b>Sequence</b>         | <b>Amplicon (bp)</b> |
|-----------------------|-------------------------|----------------------|
| Murine <i>Il1r1</i> F | GCTGACTTGAGGCAGTT       | 200                  |
| Murine <i>Il1r1</i> R | CATACGTCAATCTCCAGCGAC   |                      |
| Human <i>IL1R1</i> F  | AGGTAGACGCACCCTCTGAA    | 154                  |
| Human <i>IL1R1</i> R  | GCATTTATCAGCCTCCAGAGAAG |                      |
| Murine <i>Gapdh</i> F | CCCTTAAGAGGGATGCTGCC    | 124                  |
| Murine <i>Gapdh</i> R | TACGGCCAAATCCG TTCACA   |                      |
| Human <i>GAPDHF</i>   | TTAGGAAAGCCTGCCGGTGA    | 157                  |
| Human <i>GAPDHR</i>   | GGCGCCCAATACGACCAAA     |                      |

**SupplementaryTable S3.Deltarasin effects on a battery of murine and human cancer cell lines.**

| Originating organism | Cell line | Tissue origin                        | <i>KRAS</i> mutation | IC <sub>50</sub> (μM, mean±SD) <sup>a</sup> | <i>n</i> |
|----------------------|-----------|--------------------------------------|----------------------|---------------------------------------------|----------|
| <i>C57BL/6</i> mouse | LLC       | Lewis lung carcinoma                 | G12C                 | 1.46 ± 0.16                                 | 3        |
| <i>C57BL/6</i> mouse | MC38      | Colon adenocarcinoma                 | G13R                 | 1.23 ± 0.22                                 | 3        |
| <i>C57BL/6</i> mouse | AE17      | Malignant pleural mesothelioma       | G12C                 | 1.61 ± 0.13                                 | 3        |
| <i>FVB</i> mouse     | FULA      | Urethane-induced lung adenocarcinoma | Q61R                 | 2.10 ± 0.06                                 | 3        |
| <i>C57BL/6</i> mouse | B16F10    | Malignant skin melanoma              | None                 | 2.41 ± 0.37                                 | 3        |
| <i>C57BL/6</i> mouse | PANO2     | Pancreatic adenocarcinoma            | None                 | 2.10 ± 0.49                                 | 4        |
| <i>C57BL/6</i> mouse | CULA      | Urethane-induced lung adenocarcinoma | None                 | 1.59 ± 0.29                                 | 3        |
| Human                | A549      | Lung adenocarcinoma                  | G12S                 | 6.90 ± 0.96                                 | 3        |
| Human                | H460      | Lung large cell carcinoma            | Q61H                 | 5.27 ± 2.24                                 | 3        |
| Human                | H358      | NSCLC                                | G12C                 | 3.27 ± 1.10                                 | 3        |
| Human                | H358M     | Bronchiolo-alveolar carcinoma        | G12D                 | 3.67 ± 1.70                                 | 3        |
| Human                | H1944     | NSCLC                                | G13D                 | 6.93 ± 1.32                                 | 3        |
| Human                | H520      | Squamous cell carcinoma              | None                 | 1.67 ± 0.06                                 | 3        |
| Human                | EKVX      | Lung adenocarcinoma                  | None                 | 4.22 ± 2.41                                 | 3        |
| Human                | H1299     | NSCLC                                | None                 | 5.40 ± 1.81                                 | 3        |
| Human                | H3122     | NSCLC                                | None                 | 4.73 ± 1.38                                 | 3        |

<sup>a</sup> IC<sub>50</sub>, 50% inhibitory concentration by WST-8 assay (Biotool); SD, standard deviation; *n*, sample size; NSCLC, non-small cell lung cancer.

**Supplementary Table S4. AA12 effects on a battery of murine and human cancer cell lines.**

| Originating organism | Cell line | Tissue origin                        | <i>KRAS</i> mutation | IC <sub>50</sub> (μM, mean±SD) <sup>a</sup> | <i>n</i> |
|----------------------|-----------|--------------------------------------|----------------------|---------------------------------------------|----------|
| <i>C57BL/6</i> mouse | LLC       | Lewis lung carcinoma                 | G12C                 | 22.69 ± 7.95                                | 3        |
| <i>C57BL/6</i> mouse | MC38      | Colon adenocarcinoma                 | G13R                 | 4.59 ± 2.45                                 | 2        |
| <i>C57BL/6</i> mouse | AE17      | Malignant pleural mesothelioma       | G12C                 | 3.06 ± 1.39                                 | 2        |
| <i>FVB</i> mouse     | FULA1     | Urethane-induced lung adenocarcinoma | Q61R                 | 4.97 ± 2.28                                 | 2        |
| <i>C57BL/6</i> mouse | PANO2     | Pancreatic adenocarcinoma            | None                 | 20.85 ± 5.11                                | 2        |
| Human                | A549      | Lung adenocarcinoma                  | G12S                 | 49.30 ± 24.31                               | 3        |
| Human                | H358      | NSCLC                                | G12C                 | 27.85 ± 4.41                                | 2        |
| Human                | H3122     | NSCLC                                | None                 | 24.24 ± 11.41                               | 3        |

<sup>a</sup> IC<sub>50</sub>, 50% inhibitory concentration by WST-1 assay (Biotool); SD, standard deviation; *n*, sample size; NSCLC, non-small cell lung cancer.

**Supplementary Table S5. Cysmethynil effects on a battery of murine and human cancer cell lines.**

| Originating organism | Cell line | Tissue origin                        | <i>KRAS</i> mutation | IC <sub>50</sub> (μM, mean±SD) <sup>a</sup> | <i>n</i> |
|----------------------|-----------|--------------------------------------|----------------------|---------------------------------------------|----------|
| <i>C57BL/6</i> mouse | LLC       | Lewis lung carcinoma                 | G12C                 | 22.11 ± 2.19                                | 2        |
| <i>C57BL/6</i> mouse | MC38      | Colon adenocarcinoma                 | G13R                 | 18.13 ± 9.92                                | 2        |
| <i>C57BL/6</i> mouse | AE17      | Malignant pleural mesothelioma       | G12C                 | 17.62 ± 3.57                                | 3        |
| <i>FVB</i> mouse     | FULA1     | Urethane-induced lung adenocarcinoma | Q61R                 | 27.37 ± 7.78                                | 2        |
| <i>C57BL/6</i> mouse | B16F10    | Malignant skin melanoma              | None                 | 19.61 ± 13.27                               | 3        |
| <i>C57BL/6</i> mouse | PANO2     | Pancreatic adenocarcinoma            | None                 | 16.92 ± 17.22                               | 2        |
| Human                | A549      | Lung adenocarcinoma                  | G12S                 | 30.84 ± 9.10                                | 3        |
| Human                | H358      | NSCLC                                | G12C                 | 28.32 ± 6.57                                | 3        |
| Human                | EKVX      | Lung adenocarcinoma                  | None                 | 30.05 ± 5.66                                | 3        |
| Human                | H3122     | NSCLC                                | None                 | 10.95 ± 3.77                                | 3        |

<sup>a</sup> IC<sub>50</sub>, 50% inhibitory concentration by WST-1 assay (Biotool); SD, standard deviation; *n*, sample size; NSCLC, non-small cell lung cancer.

**Supplementary Table S6. A 42-gene mutant *KRAS* signature identified from microarray analyses.**

Genes significantly ( $P < 0.05$  by unpaired ANOVA with Bonferroni post-tests) differentially represented in *KRAS*-mutant tumor cells compared with *KRAS*-wild-type tumor cells and benign cells and tissues, at the same time >30% responsive to modulation of *KRAS* expression in all five tumor cell line doublets tested (LLC, MC38, and AE17 cells expressing shC versus sh*Kras* and PANO2 and B16F10 cells expressing pC versus p*Kras*<sup>G12C</sup>).

| Gene Symbol          | Description                                                              | <i>Kras</i> <sup>WTa</sup> | <i>Kras</i> <sup>MUTb</sup> | % <i>Kras</i> <sup>Rc</sup> |
|----------------------|--------------------------------------------------------------------------|----------------------------|-----------------------------|-----------------------------|
| <i>Ccl2</i>          | chemokine (C-C motif) ligand 2                                           | 0.82                       | 37.79                       | 56.29                       |
| <i>Ranbp3l</i>       | RAN binding protein 3-like                                               | 0.93                       | 35.26                       | 78.33                       |
| <i>Il1rl1</i>        | interleukin 1 receptor, type I                                           | 2.39                       | 25.63                       | 36.71                       |
| <i>Gpr149</i>        | G protein-coupled receptor 149                                           | 0.80                       | 22.94                       | 55.68                       |
| <i>Cfap69</i>        | cilia and flagella associated protein 69                                 | 4.50                       | 20.11                       | 40.29                       |
| <i>Ccl7</i>          | chemokine (C-C motif) ligand 7                                           | 0.96                       | 16.11                       | 50.14                       |
| <i>2810417H13Rik</i> | RIKEN cDNA 2810417H13 gene                                               | 11.39                      | 12.64                       | 42.33                       |
| <i>Pdgfra</i>        | platelet derived growth factor receptor $\alpha$                         | 1.89                       | 12.38                       | 41.60                       |
| <i>Casp3</i>         | caspase 3                                                                | 4.20                       | 10.48                       | 30.74                       |
| <i>Ttk</i>           | Ttk protein kinase                                                       | 7.94                       | 9.58                        | 45.13                       |
| <i>Kif2c</i>         | kinesin family member 2C                                                 | 5.98                       | 7.78                        | 45.06                       |
| <i>Fanca</i>         | Fanconi anemia, complementation group A                                  | 4.00                       | 5.58                        | 46.78                       |
| <i>Cdca5</i>         | cell division cycle associated 5                                         | 3.56                       | 5.43                        | 47.15                       |
| <i>Rassf8</i>        | Ras association (RalGDS/AF-6) domain family (N-terminal) member 8        | 2.46                       | 5.35                        | 32.08                       |
| <i>Hist2h3c2</i>     | histone cluster 2, H3c2                                                  | 1.20                       | 4.69                        | 38.87                       |
| <i>Plagl1</i>        | pleiomorphic adenoma gene 1                                              | 0.78                       | 4.53                        | 53.15                       |
| <i>Nadk2</i>         | NAD kinase 2, mitochondrial                                              | 1.58                       | 4.50                        | 50.89                       |
| <i>Oaf</i>           | OAF homolog (Drosophila)                                                 | 2.39                       | 4.23                        | 31.03                       |
| <i>Cxcl1</i>         | chemokine (C-X-C motif) ligand 1                                         | 1.56                       | 4.23                        | 73.09                       |
| <i>Mmd</i>           | monocyte to macrophage differentiation-associated                        | 2.93                       | 4.06                        | 35.92                       |
| <i>Csgalnact1</i>    | chondroitin sulfate N-acetylgalactosaminyltransferase 1                  | 0.74                       | 3.97                        | 50.96                       |
| <i>Clybl</i>         | citrate lyase beta like                                                  | 1.72                       | 3.76                        | 42.33                       |
| <i>Zfp334</i>        | zinc finger protein 334                                                  | 1.04                       | 3.68                        | 58.59                       |
| <i>Kras</i>          | v-Ki-ras2 Kirsten rat sarcoma viral oncogene homolog                     | 2.08                       | 2.60                        | 39.71                       |
| <i>Palb2</i>         | partner and localizer of BRCA2                                           | 2.39                       | 2.57                        | 30.55                       |
| <i>Kcnab3</i>        | potassium voltage-gated channel, shaker-related subfamily, beta member 3 | 1.25                       | 2.55                        | 49.23                       |
| <i>Mcts2</i>         | malignant T cell amplified sequence 2                                    | 1.45                       | 2.36                        | 30.65                       |
| <i>Pcnxl4</i>        | pecanex-like 4 (Drosophila)                                              | 1.38                       | 2.19                        | 39.54                       |
| <i>Gmnn</i>          | geminin                                                                  | 1.39                       | 2.04                        | 34.57                       |

|                      |                                                             |      |      |         |
|----------------------|-------------------------------------------------------------|------|------|---------|
| <i>9530077C05Rik</i> | RIKEN cDNA 9530077C05 gene                                  | 1.17 | 1.88 | 30.46   |
| <i>Poc1a</i>         | POC1 centriolar protein homolog A                           | 1.46 | 1.68 | 36.71   |
| <i>Dhx40</i>         | DEAH (Asp-Glu-Ala-His) box polypeptide 40                   | 1.28 | 1.67 | 31.03   |
| <i>Pde8a</i>         | phosphodiesterase 8A                                        | 1.54 | 0.23 | -181.67 |
| <i>mt-Tt</i>         | mitochondrially encoded tRNA theonine                       | 0.78 | 0.22 | -95.34  |
| <i>Mapkapk3</i>      | mitogen-activated protein kinase-activated protein kinase 3 | 0.60 | 0.20 | -96.43  |
| <i>Anxa6</i>         | annexin A6                                                  | 0.69 | 0.19 | -76.05  |
| <i>mt-Te</i>         | mitochondrially encoded tRNA glutamic acid                  | 0.33 | 0.16 | -49.69  |
| <i>mt-Ty</i>         | mitochondrially encoded tRNA tyrosine                       | 0.22 | 0.15 | -77.77  |
| <i>Bmyc</i>          | brain expressed myelocytomatosis oncogene                   | 1.42 | 0.15 | -71.71  |
| <i>Gm2a</i>          | GM2 ganglioside activator protein                           | 0.40 | 0.12 | -70.05  |
| <i>Smpdl3a</i>       | sphingomyelin phosphodiesterase, acid-like 3A               | 1.21 | 0.11 | -123.77 |
| <i>mt-Tn</i>         | mitochondrially encoded tRNA asparagine                     | 0.33 | 0.11 | -105.91 |

- <sup>a</sup> Normalized mRNA expression levels of *Kras*-wild-type (WT) cell lines (B16F10, B16F10 stably expressing pC, PANO2, and CULA cells) shown as fraction of expression of benign cells (bone marrow-derived macrophages and mast cells, tracheal epithelial cells) and lungs ( $n = 4/\text{group}$ ).
- <sup>b</sup> Normalized mRNA expression levels of *Kras*-mutant (MUT) cell lines (LLC, MC38, AE17, and FULA cells) shown as fraction of expression of benign cells (bone marrow-derived macrophages and mast cells, tracheal epithelial cells) and lungs ( $n = 4/\text{group}$ ).
- <sup>c</sup> Percentile mean response (R) of mRNA expression levels to *Kras* modulation, including *Kras* silencing of *Kras*-mutant cell lines (LLC, MC38, and AE17 cells) and overexpression of mutant *Kras*<sup>G12C</sup> plasmid in *Kras*-wild-type cells (B16F10 and PANO2 cells). Positive responses indicate suppression by *Kras* silencing and induction by overexpression of mutant *Kras*<sup>G12C</sup> plasmid. Negative responses indicate induction by *Kras* silencing and suppression by overexpression of mutant *Kras*<sup>G12C</sup> plasmid.

LLC, *C57BL/6* Lewis lung carcinoma; MC38, *C57BL/6* colon adenocarcinoma; AE17, *C57BL/6* malignant pleural mesothelioma; FULA, *FVB* urethane-induced lung adenocarcinoma; B16F10, *C57BL/6* malignant skin melanoma; PANO2, *C57BL/6* pancreatic adenocarcinoma; CULA, *C57BL/6* urethane-induced lung adenocarcinoma.



# SUPPLEMENTARY FIGURES

Supplementary Figure S1

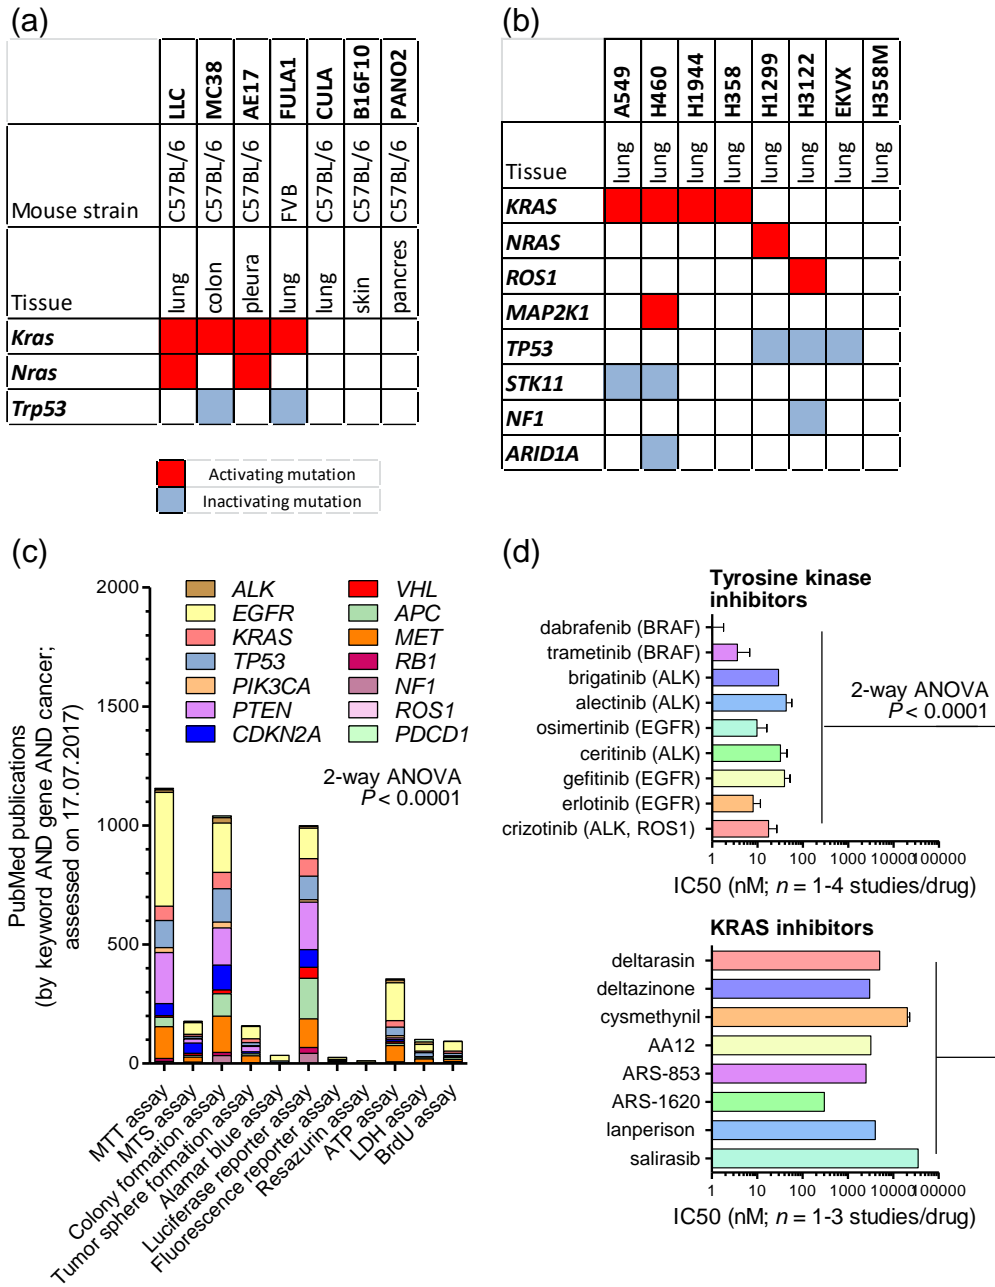

**Figure S1. Mutation status of cell lines used in this study, *in vitro* assays used in cancer re-research and comparative efficacy of KRAS versus tyrosine kinase inhibitors.**

**(a)** Murine cell lines used in this study with their syngeneic mouse strain, tissue of origin, and mutation status of *Kras*, *Nras*, and *Trp53*. Data from [S1-S6]. Red = activating mutations, blue = inactivating mutations.

**(b)** Human cell lines used in this study with their tissue of origin and mutation status of *KRAS*, *NRAS*, *ROS1*, *MAP2K1*, *TP53*, *STK11*, *NF1*, and *ARID1A*. Data from [S7]. Red = activating mutations, blue = inactivating mutations.

**(c)** Summary of *in vitro* assays used in cancer research stratified by target gene. Data are from a PubMed search done between 17-29.07.2018 using search strategy (“assay type” AND “gene” AND “cancer”) and the number of retrieved publications as the readout. Assay types are listed in the x-axis and genes in the legend. MTT, 3-(4,5-dimethylthiazol-2-yl)-2,5-diphenyltetrazolium bromide; MTS, 3-(4,5-dimethylthiazol-2-yl)-5-(3-carboxymethoxyphenyl)-2-(4-sulfophenyl)-2H-tetrazolium); ATP, adenosine triphosphate; LDH, Lactate dehydrogenase; BrdU, bromodeoxyuridine, 5-bromo-2'-deoxyuridine. *P*, overall probability by 2-way ANOVA. Note that MTT/MTS and colony formation assays are the most commonly used and were used in this study.

**(d)** Fifty percent inhibitory concentrations (IC<sub>50</sub>) of selected FDA-approved tyrosine kinase inhibitors (TKI; top) and of published KRAS inhibitors (bottom) in preclinical development. *n*, published studies; *P*, overall probability by 2-way ANOVA. Note the statistically significantly higher and physiologically difficult to achieve IC<sub>50</sub> of KRAS inhibitors compared with TKI. Data were from [S8-S25].

Supplementary Figure S2

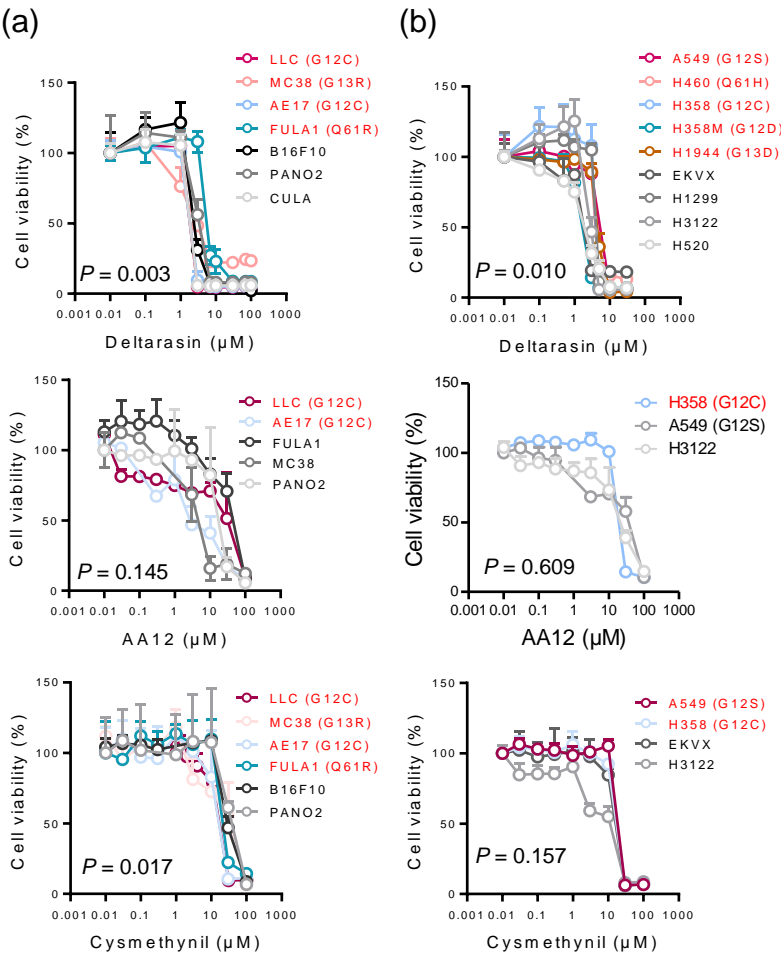

**Figure S2. Response of *KRAS*-mutant tumor cells to *KRAS* inhibitors analyzed by WST-1 assay.**

Different mouse (**a**; *Kras*<sup>MUT</sup>: LLC, MC38, AE17, FULA1; *Kras*<sup>WT</sup>: B16F10, CULA, PANO2) and human (**b**; *KRAS*<sup>MUT</sup>: A549, H460, H358, H358M, H1944, HOP-62; *KRAS*<sup>WT</sup>: EKVX, H1299, H3122, H520) tumor cell lines were assessed for inhibition of cell viability (determined by WST-1 assay,  $n = 3$ /data-point) by three different *KRAS* inhibitors: deltarasin (top), AA12 (middle), and cysmethynil (bottom).

Data presented as mean  $\pm$  SD.  $P$ , overall probability by nonlinear fit and extra sum of squares F-test.

Supplementary Figure S3

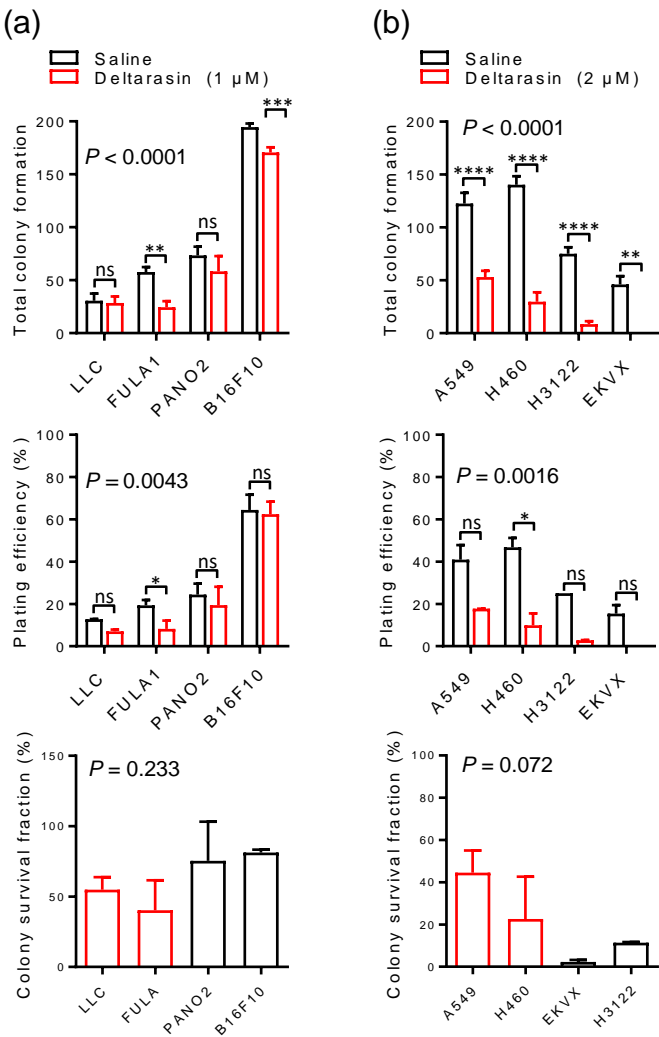

**Figure S3. Response of *KRAS*-mutant tumor cells to *KRAS* inhibitors analyzed by colony formation assay.**

Different mouse (**a**; *Kras*<sup>MUT</sup>: LLC, FULA1; *Kras*<sup>WT</sup>: B16F10, PANO2) and human (**b**; *KRAS*<sup>MUT</sup>: A549, H460; *KRAS*<sup>WT</sup>: EKVX, H3122) tumor cell lines were assessed for colony formation ( $n = 3$ / data-point) after 72 h of saline or deltarasin treatment.

Data presented as mean  $\pm$  SD.  $P$ , overall probability by one-way ANOVA. \* and \*\*\*:  $P < 0.05$  and  $P < 0.001$ , respectively, for the indicated comparisons by Bonferroni post-tests. Shown are total number of colonies formed (top), plating efficiency of 300 cells/well at experiment start (middle), and survival fraction of single cells given as ratio treatment/no treatment.

Supplementary Figure S4

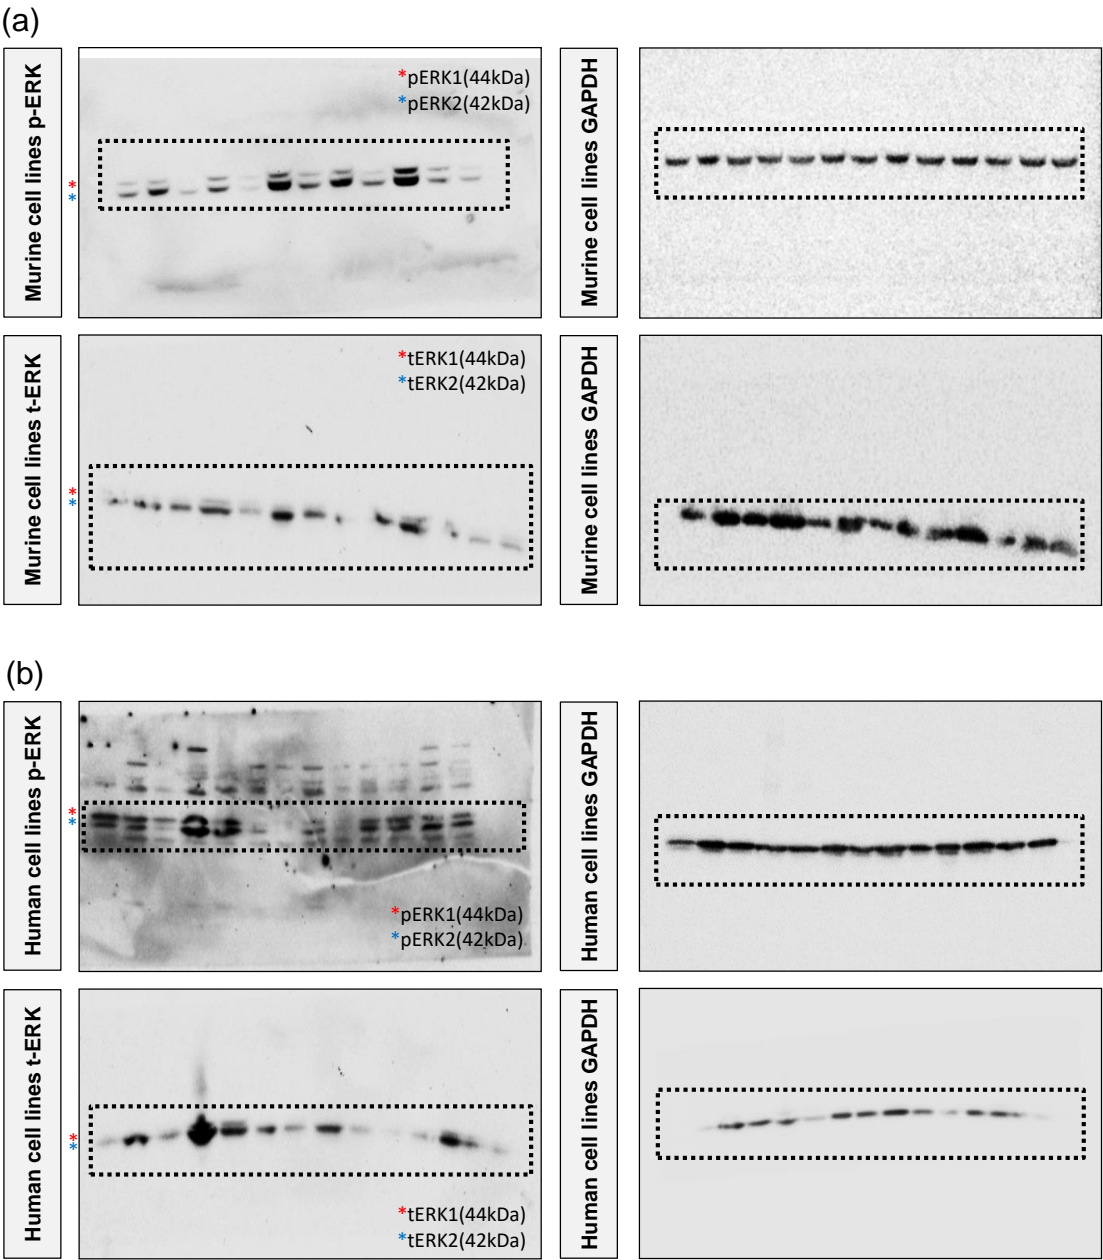

**Figure S4. Uncropped blots for Figure 1h.**

**(a)** Immunoblots of murine cell line protein extracts untreated and treated with deltarasin (72 h; IC<sub>60</sub>). Left, p-ERK, t-ERK; right, GAPDH.

**(b)** Immunoblots of human cell line protein extracts untreated and treated with deltarasin (72 h; IC<sub>60</sub>). Left, p-ERK, t-ERK; right, GAPDH.

Dashed lines represent areas of the blots shown in main Figure.



Supplementary Figure S5

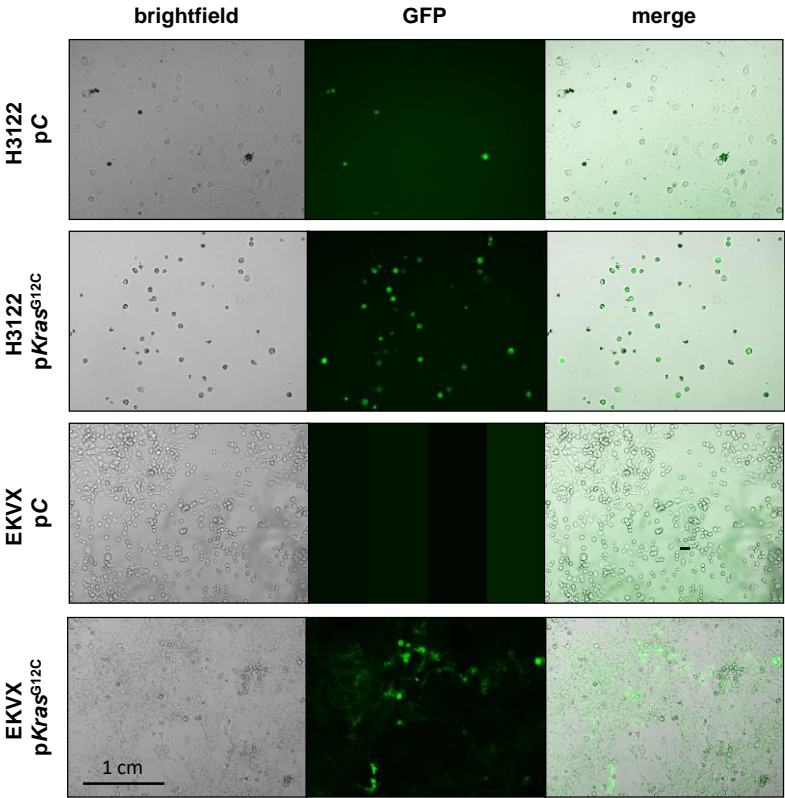

**Figure S5. Validation of p*Kras*<sup>G12C</sup> transduction in human cell lines H3122 and EKVX.**

The p*Kras*<sup>G12C</sup> plasmid includes GFP and puromycin resistance genes. Representative microscopy images of pC control or p*Kras*<sup>G12C</sup> transfected cell lines. Left, bright field images; middle, green fluorescent images; right, merged images. Images were taken with a confocal microscope LCI510 (Zeiss; Jena, Germany).

Supplementary Figure S6

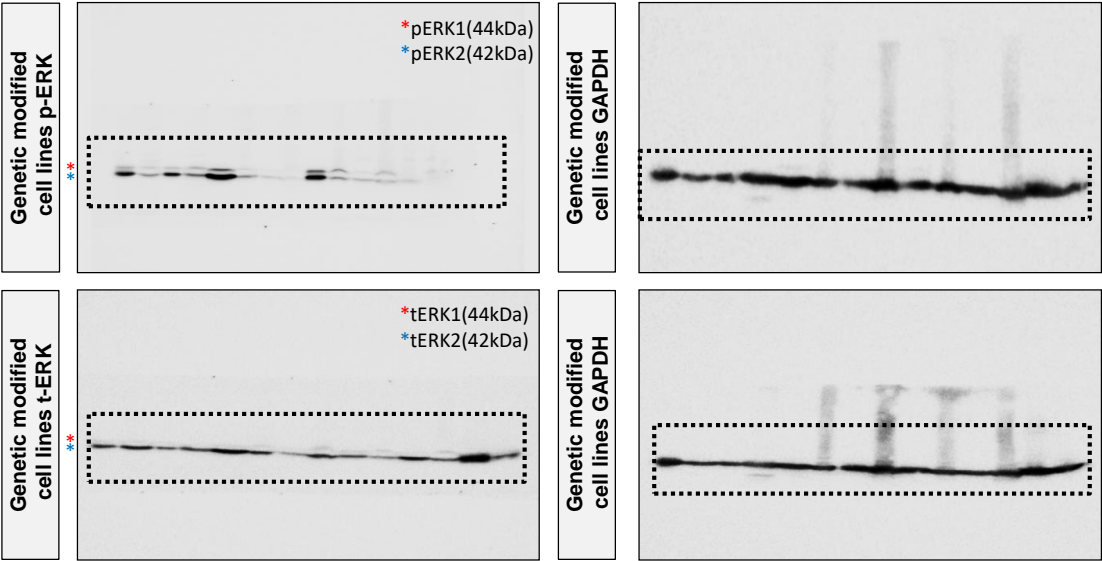

**Figure S6. Uncropped blots for Figure 3d.**

Immunoblots of murine and human cell line protein extracts with or without *Kras/KRAS* genetic modification. Left, p-ERK, t-ERK; right, GAPDH. Dashed lines represent areas of the blots shown in main Figure.
